# Supplementary material for: Tunable superoleophobicity via harnessing the surface chemistry of UV responsive titania coatings
Source: Royal Society of Chemistry journal article supplement (doi:10.1039/c8ra01458b), 2018-01-01
Supplement: c8ra01458b2.pdf [file c8ra01458b2.pdf]

## Supplementary Information:

### Tunable superoleophobicity via harnessing the surface chemistry of UV responsive titania coatings

Jitesh Barman<sup>1,2\*</sup>, Sumit Kumar Majumder<sup>2</sup>, Pritam Kumar Roy<sup>2</sup>,  
and Krishnacharya Khare<sup>2</sup>

<sup>1</sup> *Electronic Paper Display Institute, South China Normal University, Higher Education Mega Center, Guangzhou-510006, P. R. China.*

\*Email:jiteshb@m.scnu.edu.cn

<sup>2</sup> *Department of Physics, Indian Institute of Technology Kanpur, Kanpur, India-208016.*

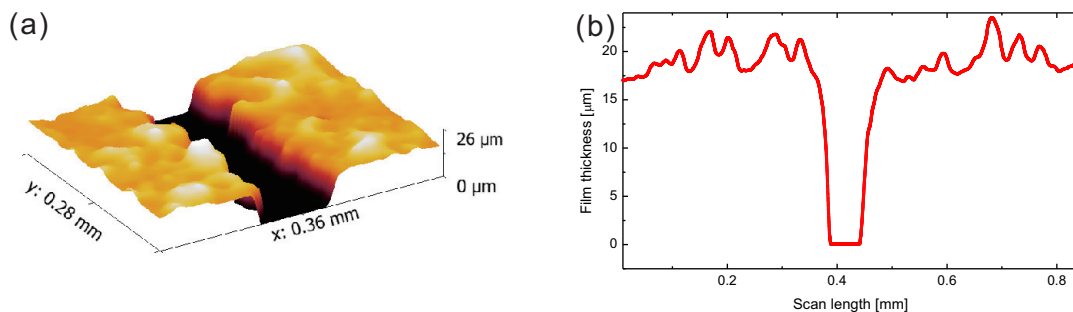

Figure S1: (a) 3D profilometry image of the titania coated Si substrate with a scratch on the coated film (b) Line scan showing the thickness and the surface feature of titania coated Si substrate.

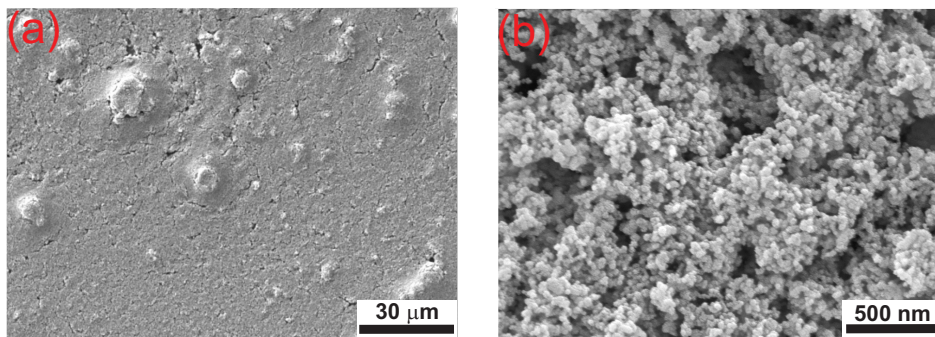

Figure S2: a) FE-SEM images of the spin coated titania surfaces showing less micron sized roughness with no reentrant property. (b) Magnified image displaying the nano porous structure of titania nanoparticles.

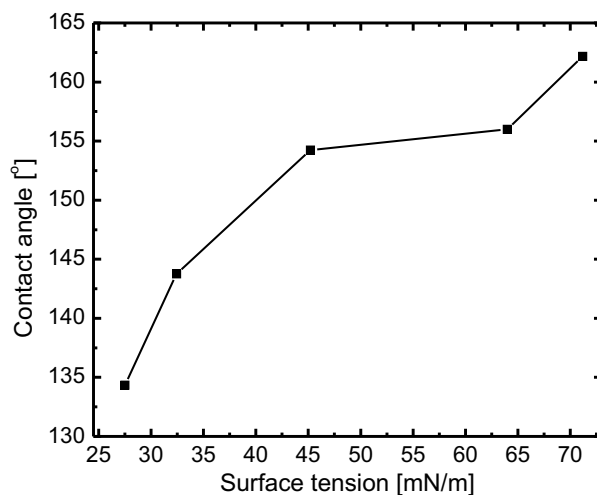

Figure S3: Apparent contact angles as function of test liquid surface tensions on oleophobic surface prepared by spin coating method.

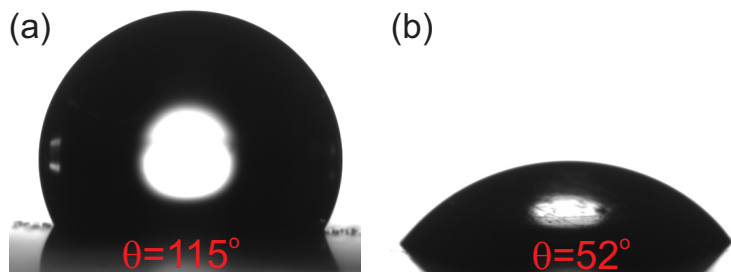

Figure S4: Young's contact angle of (a) water ( $\gamma = 72 \text{ mN/m}$ ) and (b) decane ( $\gamma = 23.3 \text{ mN/m}$ ) on PFDTs coated smooth Si substrate to show the effect of test liquid surface tension on the Young's contact angle.
